# Supplementary material
Source: PubMed Central journal article supplement (PMC2993003)

**Fairhurst et al Supplementary Table 1.**

**Summary of splenic leukocytes.** Flow Cytometry Analysis of Splenic leukocyte lineage and activation in 9 month old male mice. 1-way ANOVA was used to analyse data as described in Experimental Procedures. Significant differences between B6.*Sle1Yaa* and B6.*Sle1YaaTLR7* are shown; \*p=0.05, \*\*p=0.01, \*\*\*p=0.001. Bold indicates percentage of the total. Normal font is a subgroup of the bolded font.

|                                                                            | <b>B6<br/>(n=5)</b> | <b>B6.<i>Sle1</i><br/>(n=5)</b> | <b>B6.<i>Sle1Yaa</i><br/>(n=5)</b> | <b>B6.<i>Sle1YaaTLR7</i>-<br/>(n=5)</b> |
|----------------------------------------------------------------------------|---------------------|---------------------------------|------------------------------------|-----------------------------------------|
|                                                                            | <b>Mean ± SE</b>    | <b>Mean ± SE</b>                | <b>Mean ± SE</b>                   | <b>Mean ± SE</b>                        |
| <b>Total Cell count (x10<sup>7</sup>)</b>                                  | 11.4 ± 1.4          | 13.3 ± 0.9                      | 50.4 ± 13.1                        | 12.9 ± 0.7                              |
| <b>CD19+</b>                                                               | 58.4 ± 2.7          | 53.2 ± 2.5                      | 27.9 ± 4.7                         | 51.5 ± 1.7***                           |
| % CD69+                                                                    | 8.8 ± 1.6           | 9.9 ± 1.7                       | 19.5 ± 1.8                         | 10.1 ± 1.0*                             |
| CD86 MFI                                                                   | 39.1 ± 8.4          | 64.3 ± 5.9                      | 90.1 ± 5.0                         | 68.6 ± 7.3                              |
| <b>Follicular B<br/>(CD23<sup>+</sup>CD21<sup>+</sup>IgM<sup>lo</sup>)</b> | 39.7 ± 1.2          | 36.9 ± 1.5                      | 17.6 ± 3.0                         | 36.3 ± 1.0***                           |
| CD86 MFI                                                                   | 45.5 ± 6.9          | 70.2 ± 6.5                      | 62.1 ± 4.4                         | 73.2 ± 5.8                              |
| <b>T1 (CD23<sup>-</sup>CD21<sup>-</sup>IgM<sup>+</sup>)</b>                | 3.2 ± 0.3           | 2.0 ± 0.1                       | 1.5 ± 0.3                          | 2.1 ± 0.2                               |
| <b>T2 (CD23<sup>+</sup>CD21<sup>hi</sup>IgM<sup>hi</sup>)</b>              | 1.9 ± 0.3           | 1.9 ± 0.3                       | 0.9 ± 0.3                          | 1.6 ± 0.2                               |
| <b>MZ (CD23<sup>+</sup>CD21<sup>-</sup>IgM<sup>+</sup>)</b>                | 2.0 ± 0.1           | 2.2 ± 0.1                       | 1.0 ± 0.2                          | 1.5 ± 0.2                               |
| <b>B1a (CD5<sup>+</sup>CD23<sup>-</sup>B220<sup>+</sup>)</b>               | 1.1 ± 0.1           | 1.1 ± 0.1                       | 1.6 ± 0.3                          | 1.0 ± 0.1                               |
| <b>B1b (CD5<sup>-</sup>CD23<sup>-</sup>B220<sup>+</sup>)</b>               | 8.4 ± 0.6           | 7.7 ± 0.4                       | 6.1 ± 0.6                          | 7.1 ± 0.2                               |
| <b>B2 (CD5<sup>-</sup>CD23<sup>+</sup>B220<sup>+</sup>)</b>                | 43.9 ± 1.6          | 39.9 ± 1.8                      | 17.8 ± 3.4                         | 39.7 ± 1.4***                           |
| <b>Plasmablast<br/>(B220<sup>+</sup>CD138<sup>+</sup>)</b>                 | 2.0 ± 0.4           | 2.0 ± 0.3                       | 1.9 ± 0.7                          | 1.9 ± 0.5                               |
| <b>Plasma (B220<sup>-</sup>CD138<sup>+</sup>)</b>                          | 1.4 ± 0.2           | 1.6 ± 0.2                       | 4.0 ± 0.4                          | 2.4 ± 0.2                               |
| <b>CD4+</b>                                                                | 20.9 ± 0.7          | 21.9 ± 1.7                      | 17.1 ± 1.6                         | 21.1 ± 1.7*                             |
| %CD69+                                                                     | 15.8 ± 1.5          | 21.5 ± 2.3                      | 39.3 ± 2.4                         | 24.8 ± 3.1**                            |
| CD62L <sup>+</sup> CD44 <sup>lo</sup>                                      | 55.7 ± 0.8          | 42.1 ± 6.3                      | 17.5 ± 3.7                         | 41.3 ± 6.5*                             |
| CD62L <sup>-</sup> CD44 <sup>h</sup>                                       | 38.9 ± 0.7          | 51.8 ± 6.3                      | 77.0 ± 3.5                         | 51.3 ± 5.5**                            |
| CD25 <sup>+</sup> CD127 <sup>-</sup>                                       | 10.4 ± 0.8          | 11.9 ± 0.6                      | 14.2 ± 0.5                         | 12.3 ± 1.0                              |
| CD25 <sup>+</sup> CD127 <sup>+</sup>                                       | 1.4 ± 0.2           | 1.6 ± 0.3                       | 3.7 ± 0.3                          | 1.7 ± 0.3***                            |
| ICOS MFI                                                                   | 419 ± 14            | 603 ± 60                        | 1482 ± 19                          | 719 ± 114                               |
| PD-1 MFI                                                                   | 115 ± 7             | 188 ± 30                        | 429 ± 65                           | 188 ± 41                                |
| CXCR5 MFI                                                                  | 22 ± 4.2            | 65 ± 19.7                       | 117 ± 7.9                          | 68 ± 20.9                               |
| <b>CD8+</b>                                                                | 12.4 ± 0.5          | 12.7 ± 0.7                      | 4.9 ± 1.4                          | 12.0 ± 1.5**                            |
| %CD69+                                                                     | 11.8 ± 1.0          | 14.2 ± 2.7                      | 27.1 ± 1.8                         | 14.9 ± 1.6                              |
| CD62L <sup>+</sup> CD44 <sup>lo</sup>                                      | 87.1 ± 1.5          | 76.4 ± 9.3                      | 50.4 ± 7.9                         | 86.5 ± 2.4                              |
| CD62L <sup>-</sup> CD44 <sup>h</sup>                                       | 8.3 ± 0.8           | 13.7 ± 4.2                      | 38.4 ± 6.2                         | 7.7 ± 1.3*                              |
| PD-1 MFI                                                                   | 210.6 ± 19.2        | 293.2 ± 57.1                    | 430.9 ± 29.1                       | 258.5 ± 31.0*                           |

|                               |             |             |              |                |
|-------------------------------|-------------|-------------|--------------|----------------|
| <b>Total Myeloid (CD11b+)</b> | 3.0 ± 0.3   | 5.0 ± 0.3   | 29.1 ± 5.3   | 5.4 ± 0.5***   |
| %CD69+                        | 10.0 ± 3.0  | 7.7 ± 1.0   | 20.1 ± 2.5   | 10.8 ± 1.1*    |
| CD11b MFI                     | 1006 ± 21.9 | 1236 ± 44.1 | 2292 ± 214.7 | 1301 ± 64.0*** |
| MHC II MFI                    | 4786 ± 735  | 1557 ± 288  | 429 ± 145    | 1789 ± 440***  |
| CD62L MFI                     | 3428 ± 226  | 2074 ± 396  | 737 ± 116    | 2376 ± 155     |
| CXCR4 MFI                     | 97 ± 15     | 174 ± 27    | 642 ± 58     | 217 ± 17***    |
| CD86 MFI                      | 798 ± 44    | 599 ± 46    | 331 ± 95     | 675 ± 97*      |
| <b>PMNs</b>                   | 1.4 ± 0.9   | 2.2 ± 0.8   | 8.0 ± 2.0    | 1.9 ± 0.6***   |
| CD11b MFI                     | 3351 ± 188  | 2386 ± 120  | 3987 ± 704   | 4458 ± 334     |
| MHC II MFI                    | 442 ± 30    | 267 ± 35    | 127 ± 21     | 201 ± 30       |
| CD62L MFI                     | 3834 ± 178  | 2479 ± 588  | 888 ± 244    | 2321 ± 148     |
| CXCR4 MFI                     | 303 ± 26    | 247 ± 42    | 471 ± 65     | 220 ± 9**      |
| CD86 MFI                      | 315 ± 16    | 140 ± 20    | 86 ± 31      | 113 ± 23       |
| <b>Gr1+monocytes</b>          | 1.0 ± 0.2   | 1.9 ± 0.2   | 8.9 ± 1.6    | 1.6 ± 0.2***   |
| CD11b MFI                     | 1873 ± 36   | 2026 ± 107  | 2717 ± 228   | 2327 ± 91      |
| MHC II MFI                    | 882 ± 78    | 587 ± 97    | 183 ± 28     | 418 ± 69       |
| CD62L MFI                     | 2749 ± 188  | 1903 ± 338  | 927 ± 93     | 1776 ± 62      |
| CXCR4 MFI                     | 210 ± 41    | 156 ± 23    | 440 ± 65     | 197 ± 8**      |
| CD86 MFI                      | 592 ± 42    | 425 ± 40    | 173 ± 59     | 361 ± 30**     |
| <b>Gr1lo/-monocytes</b>       | 1.7 ± 0.1   | 2.8 ± 0.1   | 12.9 ± 3.6   | 2.7 ± 0.2**    |
| CD11b MFI                     | 1526 ± 22   | 1596 ± 37   | 2086 ± 72    | 1624 ± 17**    |
| MHC II MFI                    | 9689 ± 548  | 5917 ± 498  | 1959 ± 830   | 7438 ± 1038**  |
| CD62L MFI                     | 2634 ± 482  | 1139 ± 128  | 328 ± 71     | 150 ± 195*     |
| CXCR4 MFI                     | 66 ± 10     | 189 ± 30    | 671 ± 76     | 178 ± 20       |
| CD86 MFI                      | 1142 ± 89   | 977 ± 36    | 732 ± 120    | 1102 ± 143     |

**Fairhurst et al: Supplementary Table 2.**

**Summary of splenic leukocytes in the kidney.** Flow Cytometry Analysis of leukocyte lineage

and activation in 9 month old male mice. 1-way ANOVA was used to analyse data as described

in Experimental Procedures. Significant differences between B6.*Sle1Yaa* and B6.*Sle1YaaTLR7*

are shown; \*p=0.05, \*\*p=0.01, \*\*\*p=0.001

|                                           | <b>B6<br/>(n=5)</b> | <b>B6.<i>Sle1</i><br/>(n=5)</b> | <b>B6.<i>Sle1Yaa</i><br/>(n=5)</b> | <b>B6.<i>Sle1YaaTLR7</i>-<br/>(n=5)</b> |
|-------------------------------------------|---------------------|---------------------------------|------------------------------------|-----------------------------------------|
|                                           | <b>Mean ± SE</b>    | <b>Mean ± SE</b>                | <b>Mean ± SE</b>                   | <b>Mean ± SE</b>                        |
| <b>Total Cell count (x10<sup>7</sup>)</b> | 16.7 ± 1.7          | 14.0 ± 0.9                      | 22.6 ± 4.7                         | 16.0 ± 1.9                              |
| <b>CD19+</b>                              | 9.0 ± 1.2           | 8.6 ± 2.0                       | 2.9 ± 0.6                          | 7.3 ± 0.8                               |
| % CD69+                                   | 18.0 ± 1.0          | 22.9 ± 4.9                      | 48.5 ± 7.9                         | 17.8 ± 2.2**                            |
| CXCR4 MFI                                 | 201 ± 49            | 227 ± 84                        | 670 ± 162                          | 172 ± 33**                              |
| <b>CD4+</b>                               | 12.3 ± 1.4          | 12.4 ± 1.3                      | 22.1 ± 2.5                         | 12.6 ± 1.3**                            |
| %CD69+                                    | 34.0 ± 1.4          | 33.1 ± 2.2                      | 35.5 ± 2.7                         | 38.5 ± 2.6                              |
| CD62L <sup>+</sup> CD44 <sup>lo</sup>     | 15.7 ± 3.4          | 17.0 ± 3.5                      | 12.5 ± 5.7                         | 8.8 ± 1.3                               |
| CD62L <sup>-</sup> CD44 <sup>h</sup>      | 77.2 ± 4.7          | 74.7 ± 5.0                      | 61.1 ± 6.9                         | 86.0 ± 1.8                              |
| ICOS MFI                                  | 610 ± 60            | 592 ± 25                        | 1253 ± 123                         | 635 ± 38***                             |
| PD-1 MFI                                  | 280 ± 55            | 453 ± 121                       | 626 ± 162                          | 259 ± 44                                |
| <b>CD8+</b>                               | 13.7 ± 1.1          | 11.0 ± 1.8                      | 8.1 ± 1.2                          | 6.6 ± 0.8                               |
| %CD69+                                    | 50.0 ± 1.3          | 44.4 ± 2.3                      | 56.8 ± 7.4                         | 47.8 ± 0.5                              |
| CD62L <sup>+</sup> CD44 <sup>lo</sup>     | 20.7 ± 1.9          | 29.4 ± 8.7                      | 16.7 ± 2.6                         | 19.3 ± 3.2                              |
| CD62L <sup>-</sup> CD44 <sup>h</sup>      | 50.8 ± 10.8         | 33.2 ± 13.6                     | 65.0 ± 5.5                         | 71.4 ± 2.9*                             |
| <b>Total Myeloid<br/>(CD11b+)</b>         | 56.7 ± 1.3          | 61.1 ± 2.3                      | 70.3 ± 2.7                         | 67.4 ± 1.3                              |
| CD11b MFI                                 | 1818 ± 58           | 2068 ± 150                      | 3773 ± 124                         | 2292 ± 94                               |
| MHC II MFI                                | 9906 ± 346          | 8075 ± 1599                     | 2327 ± 1308                        | 10182 ± 752*                            |
| CD62L MFI                                 | 82.6 ± 9.9          | 74.8 ± 5.4                      | 42.7 ± 33.4                        | 24.3 ± 14.1                             |
| CXCR4 MFI                                 | 430 ± 19            | 417 ± 49                        | 448 ± 46                           | 365 ± 25                                |
| CD86 MFI                                  | 1504 ± 39.0         | 1463 ± 122                      | 1218 ± 204                         | 1450 ± 82                               |
| <b>PMNs</b>                               | 1.8 ± 1.0           | 1.9 ± 0.7                       | 1.7 ± 1.0                          | 1.3 ± 0.2                               |
| CD11b MFI                                 | 12584 ± 506         | 12580 ± 1605                    | 19249 ± 1223                       | 14815 ± 520                             |
| MHC II MFI                                | 123 ± 71            | 91 ± 76                         | 325 ± 298                          | 136 ± 49                                |
| <b>Gr1<sup>++</sup>monocytes</b>          | 2.0 ± 0.4           | 2.4 ± 0.3                       | 3.7 ± 0.3                          | 1.7 ± 0.1***                            |
| CD11b MFI                                 | 6659 ± 216          | 6641 ± 210                      | 8171 ± 277                         | 6889 ± 71**                             |
| MHC II MFI                                | 276 ± 77            | 365 ± 108                       | 662 ± 342                          | 429 ± 54                                |
| CXCR4 MFI                                 | 21 ± 9.9            | 42.6 ± 27                       | 262.9 ± 63.1                       | 8.4 ± 21.6**                            |
| CD86 MFI                                  | 531 ± 42            | 692 ± 127                       | 1145 ± 107                         | 551 ± 45                                |
| %CD69+                                    | 29.2 ± 1.6          | 29.0 ± 3.0                      | 39.2 ± 5.1                         | 24.9 ± 1.6*                             |

|                      |             |              |             |                |
|----------------------|-------------|--------------|-------------|----------------|
| <b>Gr1+monocytes</b> | 21.9 ± 0.4  | 24.2 ± 1.3   | 29.2 ± 1.2  | 28.0 ± 1.3     |
| CD11b MFI            | 1437 ± 42   | 1674 ± 141   | 2977 ± 124  | 1866 ± 75      |
| MHC II MFI           | 10754 ± 288 | 9121 ± 1530  | 2635 ± 1266 | 10018 ± 603*** |
| CD62L MFI            | 139 ± 16    | 112 ± 7      | 88 ± 37     | 52 ± 22        |
| CXCR4 MFI            | 639 ± 26    | 591 ± 72     | 592 ± 55    | 504 ± 31       |
| CD86 MFI             | 1633 ± 73   | 1613 ± 101.2 | 1227 ± 181  | 1495 ± 107     |
| %CD69+               | 70.5 ± 1.1  | 65.0 ± 3.6   | 59.4 ± 5.8  | 62.8 ± 1.8     |
| <b>Gr1+monocytes</b> | 29.3 ± 0.6  | 30.9 ± 1.1   | 32.7 ± 1.8  | 34.5 ± 0.9     |
| CD11b MFI            | 1740 ± 53   | 1955 ± 173   | 3716 ± 132  | 2386 ± 118     |
| MHC II MFI           | 11721 ± 268 | 9689 ± 1818  | 2693 ± 1704 | 11859 ± 923    |
| CXCR4 MFI            | 507 ± 18    | 489 ± 55     | 436 ± 45    | 411 ± 26       |
| CD86 MFI             | 1712 ± 70   | 1637 ± 126   | 1234 ± 212  | 1557 ± 69      |
| %CD69+               | 62.7 ± 1.3  | 58.1 ± 3.7   | 47.3 ± 6.3  | 55.3 ± 2.2     |

Fairhurst et al: Supplemental Figure 1:

**Deletion of an additional copy of TLR7 in B6.Yaa Mice.** B6.Yaa mice were backcrossed to TLR7 deficient mice and the mRNA expression examined using RT-PCR with Primer sets from Applied Biosystems (A). Flow cytometry plots of 9 month old male B6, B6.Sle1, B6.Sle1Yaa and B6.Sle1YaaTLR7- mice demonstrate a resolution of phenotypes. (B&C). The CD4+ memory population is restored to normal levels on TLR7 deletion (B). Marginal Zone B cell depletion is also restored on TLR7 deletion (C).

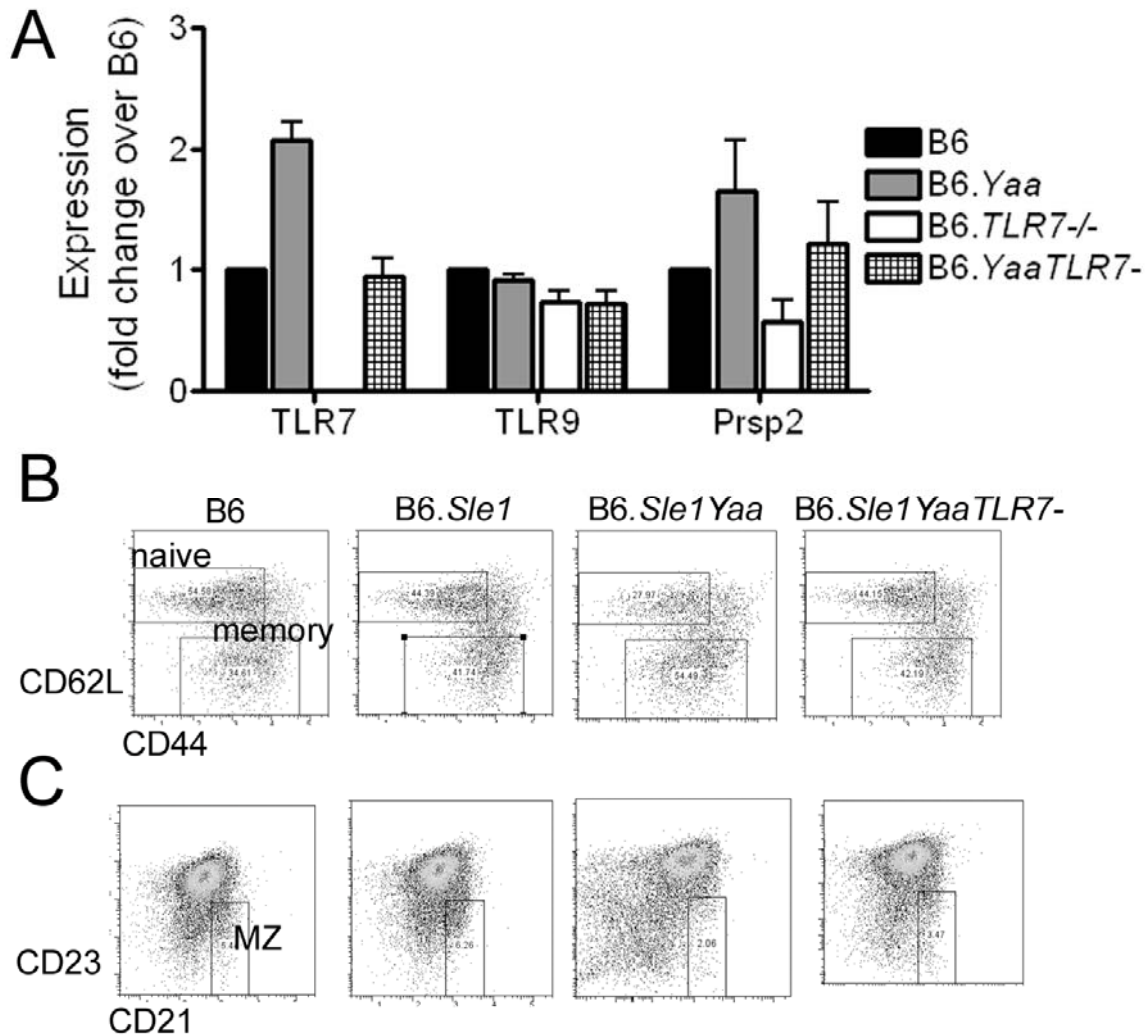

Fairhurst et al: Supplemental Figure 2:

**Serum Analysis of Ig in a separate cohort of 9 month mice.** The autoantigen was repeated in a separate cohort of 9 month old mice at the UT Southwestern Microarray Core facility. The autoantigen specificity of these antibodies is shown for IgM (a) and IgG (b)

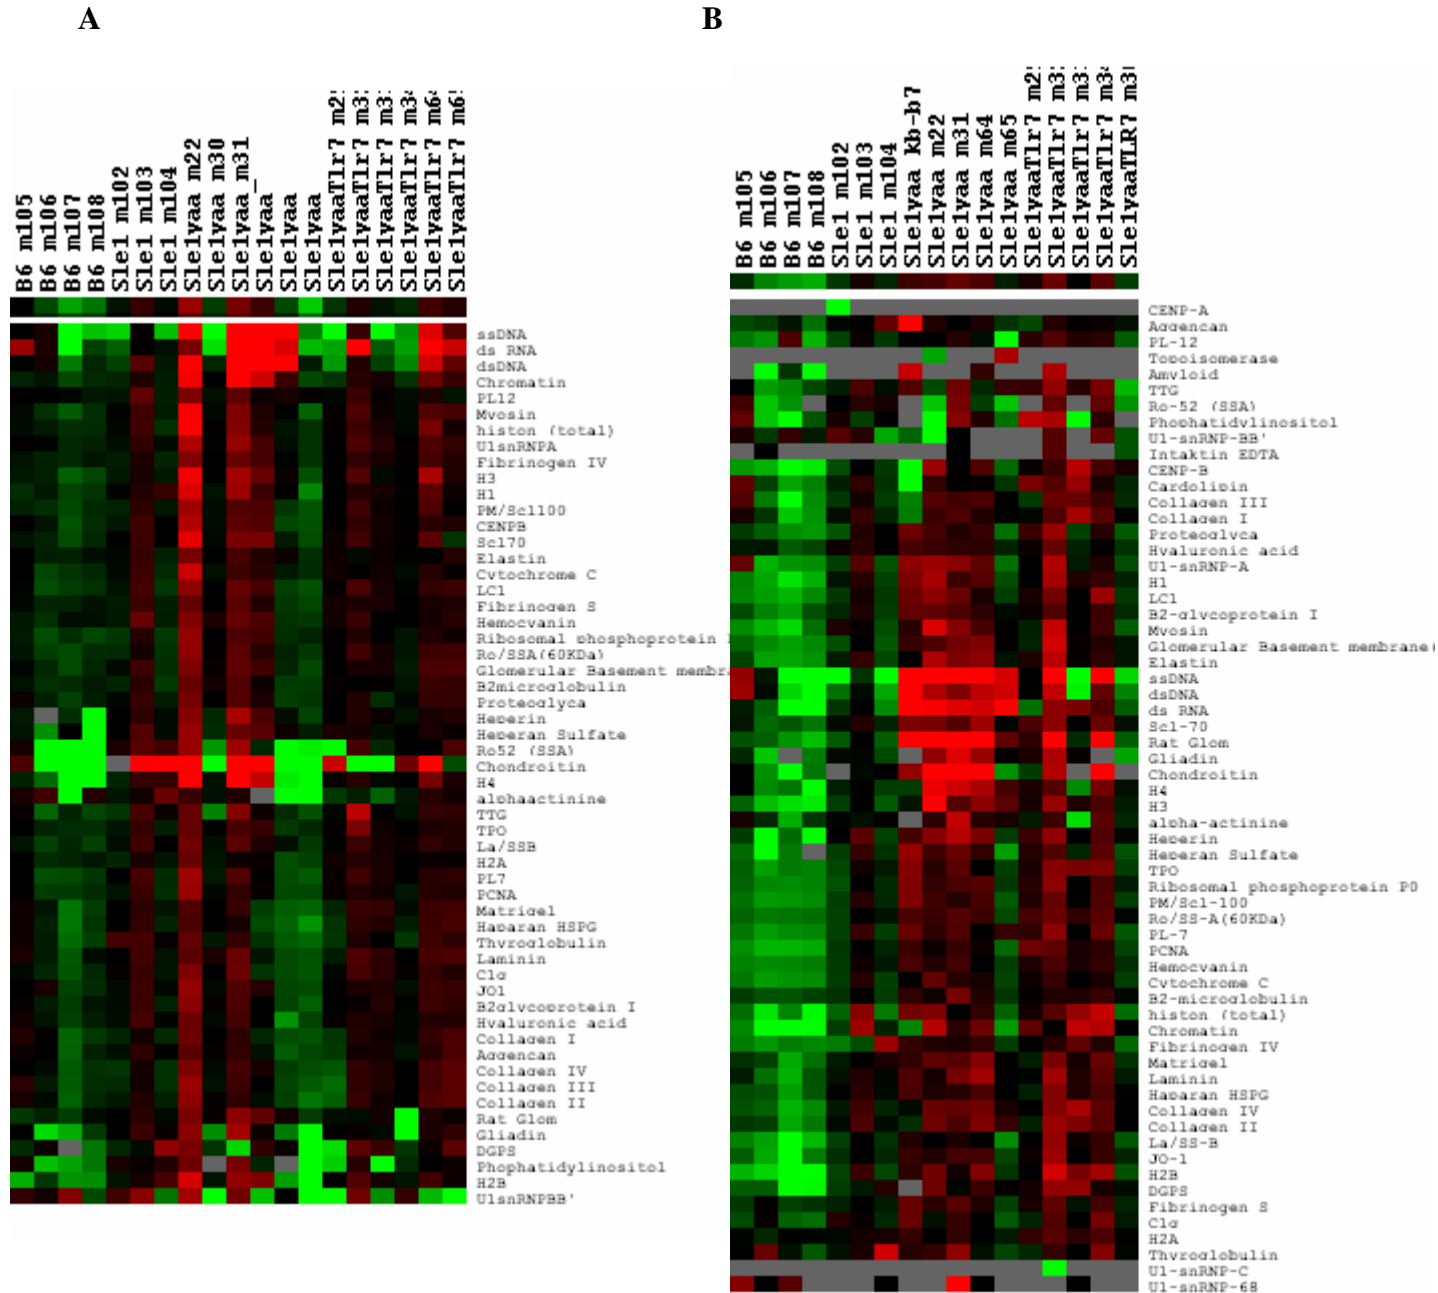

Fairhurst et al: Supplemental Figure 3:

**U1snRNP levels in aged mice.** Immulon II plates (Dynatech Laboratories, Chantilly, VA), precoated with methylated BSA, were coated with 0.4 $\mu$ g/ml each of U1-snRNP C Protein, U1-snRNP C A Protein and U1-snRNP C 68 Protein, as recommended by the manufacturer (Diarect, Germany). After blocking with PBS/3% BSA/0.1% gelatin/3mM EDTA, 1/800 dilutions of the test sera were incubated in duplicate for 2h at room temperature (Optimization of this dilution was determined using 5 MRLlpr mice in an initial experiment). Bound IgG was detected with alkaline phosphatase (AP)-conjugated anti-mouse IgG (Jackson ImmunoResearch Laboratories, West Grove, PA or IgM-AP (Southern Biotech)) using pNPP as a substrate. Raw OD was converted to U/ml using positive control serum from an MRLlpr mouse. Positive sera were determined to be values over B6 (mean+ 4 SD).

A. U1snRNP levels in mice aged 5-6 months

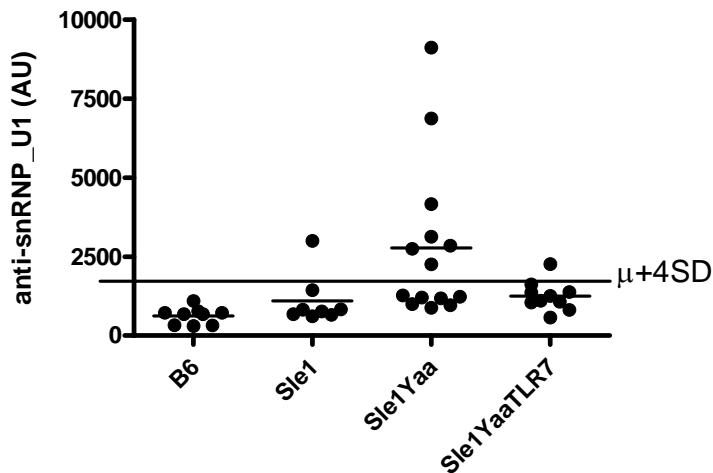

B. U1snRNP levels in mice aged 9 months

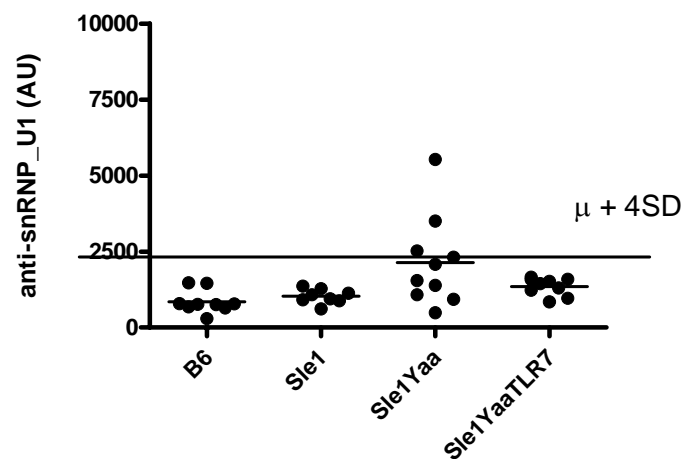





Fairhurst et al: Supplemental Figure 5

**Gating Strategy for the Myeloid lineage.** Spleens and kidneys from 9 month old male B6, B6.*Sle1*, B6.*Sle1Yaa* and B6.*Sle1YaaTLR7*<sup>-</sup> mice were processed for flow cytometry as described in Experimental Procedures. Live splenic cells were gated on CD4 and CD8 and the non-T population was analyzed for CD19 expression (A). Non B cells were then gated and examined for expression of Gr1 and CD11b. PMNs have high Gr1<sup>+</sup> expression (G1, A). Myeloid cells are gated into Gr1<sup>high</sup> (G2), and Gr1<sup>lo/-</sup> (G3). Kidney leukocytes were gated on using CD45<sup>+</sup> and forward scatter (FSC) (B). Leukocytes were then gated on nonT and nonB, as for splenic gating. The resultant CD11b vs Gr1 plot showed 4 main populations that were CD11b<sup>+</sup>. PMNs are Gr1<sup>+</sup> (G1 side scatter high). Remaining myeloid cells are gated into Gr1<sup>++</sup> monocytes (G2) and Gr1<sup>+</sup> (G3) and Gr1<sup>-</sup> myeloid cells (G4).

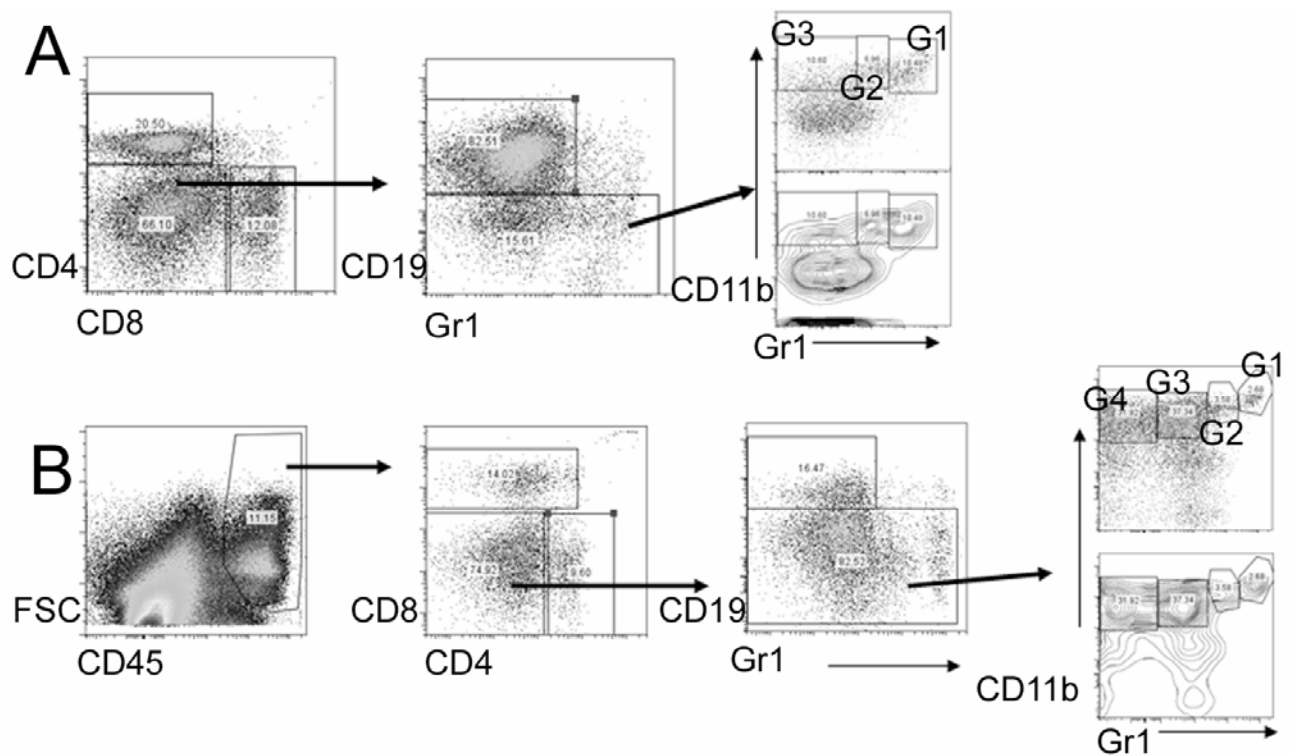

Supplement: NIHMS241322-supplement-SupMat.pdf [file NIHMS241322-supplement-SupMat.pdf]
